# Supplementary material
Source: PubMed Central journal article supplement (PMC9883191)
Supplement: mmc1.pdf [file mmc1.pdf]

**Supplemental information**

**Monkeypox infection elicits strong antibody and B  
cell response against A35R and H3L antigens**

**Ron Yefet, Nadav Friedel, Hadas Tamir, Ksenia Polonsky, Michael Mor, Lilach Cherry-Mimran, Eyal Taleb, David Hagin, Eli Sprecher, Tomer Israely, and Natalia T. Freund**

**Table S1: VPXV donors' data**

| <b>Donor ID</b> | <b>Age</b> | <b>Sex</b> | <b>Time from vaccination to sample collection (days)</b> |
|-----------------|------------|------------|----------------------------------------------------------|
| Vpx01           | 31         | Male       | 39                                                       |
| Vpx02           | 35         | Male       | 39                                                       |
| Vpx03           | 44         | Male       | 26                                                       |
| Vpx04           | 47         | Male       | 26                                                       |
| Vpx05           | 35         | Male       | 39                                                       |
| Vpx06           | 34         | Male       | 39                                                       |

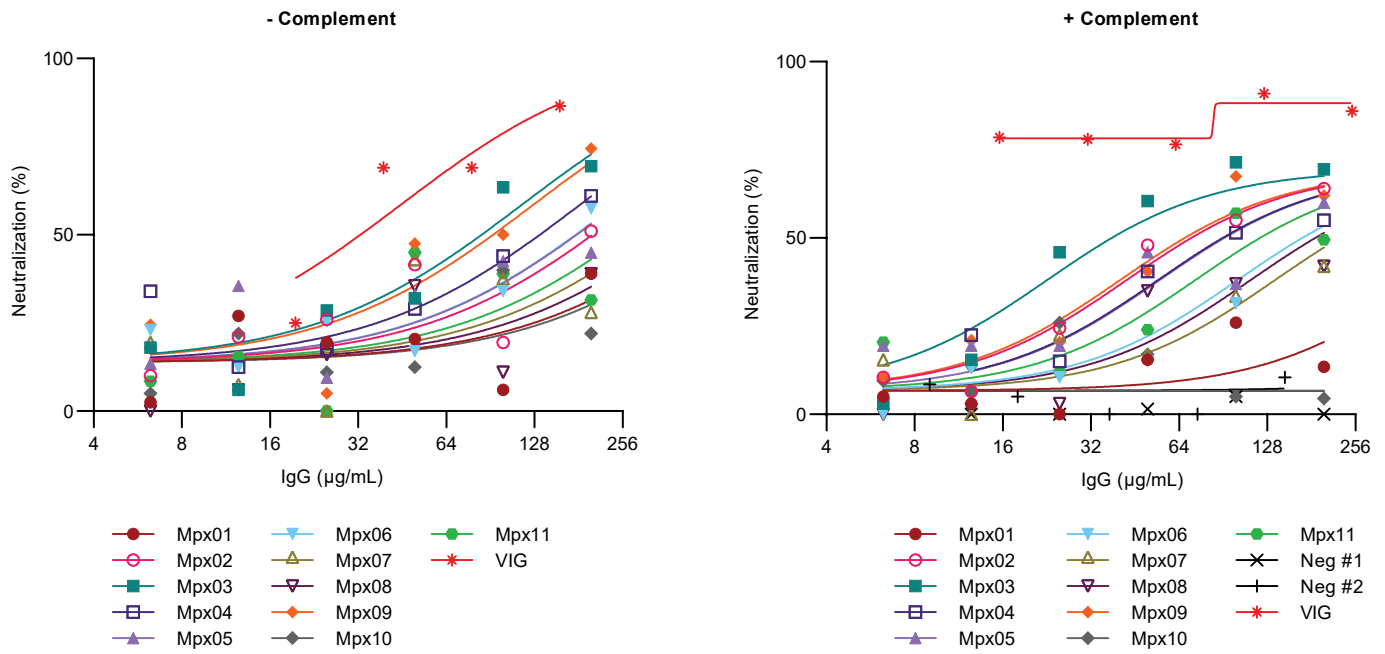

**Figure S1: Serum response against VACV in PRNT. Related to Figure 1.**

VACV Lister neutralization of infection by PRNT in Vero cells of 6 consecutive dilutions of MPXV purified IgG, starting from 200  $\mu\text{g/mL}$ . Trend lines represent nonlinear regression of each MPXV recoveree (individual donors' symbols are indicated below the graph). VIG serves as a positive control shown in red, while the uninfected non-vaccinated sera (Neg#1 and Neg#2) are in black. Left panel: without complement. Right panel: with complement.



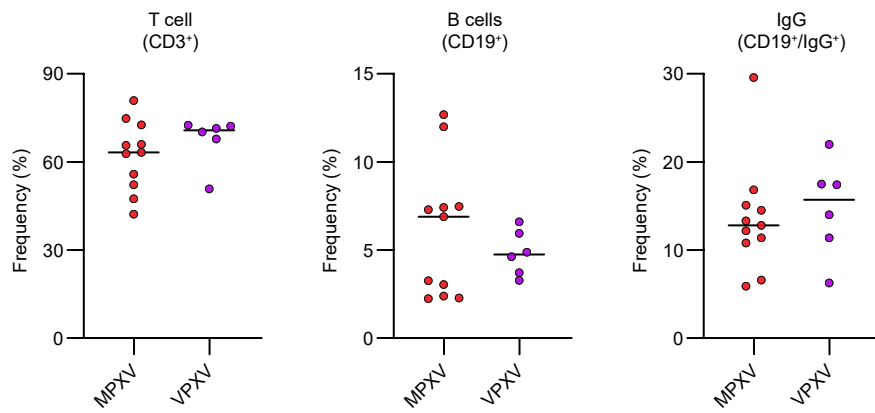

**Figure S3: Frequencies of MPXV recoverees' lymphocytes. Related to Figure 3.**

Left, middle and right panels: frequency of CD3+, CD19+ and IgG+ B cells (gated from CD19+ population), respectively, from PBMCs of MPXV recoverees (n=11) and VPXV (n=6) as detected by Flow Cytometry.
